# Supplementary material
Source: publisher figshare collection journal article supplement (https://tandf.figshare.com/ndownloader/files/13513673)
Supplement: Supplementary file 1 [file 13513673]

**Supplementary Information:**

**An efficient heterogeneous gold(I)-catalyzed hydration of haloalkynes leading to α-halomethyl ketones**

Sifan Hua, Dayi Liua, Chenyu Yanb, and Mingzhong Cai*a

aKey Laboratory of Functional Small Organic Molecule, Ministry of Education and College of Chemistry & Chemical Engineering, Jiangxi Normal University, Nanchang 330022, China; bAffiliated Middle School of Jiangxi Normal University, Nanchang 330022, China

E-mail: caimzhong@163.com

**General procedure for the synthesis of α-halomethyl ketones 2a-2b'.**

To a solution of haloalkyne (0.5 mmol) in DCE (5 mL) were added H2O (27 mg, 1.5 mmol) and MCM-41-PPh3-AuNTf2 (58 mg, 0.015 mmol). The reaction mixture was stirred at room temperature and the progress of the reaction was monitored by TLC. The reaction typically took 14 h. After completion of the reaction, the catalyst was separated by a simple filtration of the reaction solution, washed with acetone (2 × 5 mL), and reused in the next run. The filtrate was concentrated under reduced pressure and the residue was purified by chromatography on silica gel (eluent: light petroleum ether/ethyl acetate = 25 :1) to afford the desired product **2a-2b'**.

**2-Bromo-1-phenylethan-1-one (2a).** White solid; yield: 92%; mp 50-51 °C (lit.[1] mp 51-52 °C); 1H NMR (400 MHz, CDCl3): δ 7.98-7.95 (m, 2H), 7.59 (t, *J* = 7.4 Hz, 1H), 7.47 (t, *J* = 7.6 Hz, 2H), 4.45 (s, 2H) ppm; 13C NMR (100 MHz, CDCl3): δ 191.3, 133.9, 130.9, 128.9, 128.8, 30.8 ppm.

**2-Bromo-1-(*p*-tolyl)ethan-1-one (2b).** White solid; yield: 91%; mp 51-52 °C (lit.[1] mp 50-51 °C);1H NMR (400 MHz, CDCl3): δ 7.88 (d, *J* = 8.4 Hz, 2H), 7.28 (d, *J* = 8.0 Hz, 2H), 4.42 (s, 2H), 2.42 (s, 3H) ppm; 13C NMR (100 MHz, CDCl3): δ 190.9, 145.0, 131.5, 129.6, 129.1, 30.9, 21.7 ppm.

**2-Bromo-1-(4-methoxyphenyl)ethan-1-one (2c).**White solid; yield: 84%; mp 73-74 °C (lit.[1] mp 72-73 °C);1H NMR (400 MHz, CDCl3): δ 7.97 (d, *J* = 8.8 Hz, 2H), 6.96 (d, *J* = 8.8 Hz, 2H), 4.40 (s, 2H), 3.88 (s, 3H) ppm; 13C NMR (100 MHz, CDCl3): δ 189.9, 164.2, 131.4, 127.0, 114.1, 55.6, 30.7 ppm.

**2-Bromo-1-(4-butylphenyl)ethan-1-one (2d).**White solid; yield: 85%; mp 52-53 °C;1H NMR (400 MHz, CDCl3): δ 7.90 (d, *J* = 8.4 Hz, 2H), 7.29 (t, *J* = 8.0 Hz, 2H), 4.43 (s, 2H), 2.68 (t, *J* = 7.6 Hz, 2H), 1.66-1.58 (m, 2H), 1.41-1.32 (m, 2H), 0.93 (t, *J* = 7.4 Hz, 3H) ppm; 13C NMR (100 MHz, CDCl3): δ 190.9, 149.9, 131.7, 129.1, 128.9, 35.8, 33.1, 30.9, 22.3, 13.9 ppm; HRMS calcd for C12H15BrO+ [M+]: 254.0306, found 254.0311.

**2-(4-(2-Bromoacetyl)phenyl)acetonitrile (2e).** White solid; yield: 87%; mp 84-85 °C;1H NMR (400 MHz, CDCl3): δ 8.00 (d, *J* = 8.4 Hz, 2H), 7.48 (d, *J* = 8.8 Hz, 2H), 4.45 (s, 2H), 3.85 (s, 2H) ppm; 13C NMR (100 MHz, CDCl3): δ 190.6, 136.0, 133.8, 129.8, 128.5, 116.9, 30.7, 23.7 ppm; HRMS calcd for C10H8BrNO+ [M+]: 236.9789, found 236.9787.

**2-Bromo-1-(4-chlorophenyl)ethan-1-one (2f).**White solid; yield: 92%; mp 95-96 °C (lit.[2] mp 96-97 °C);1H NMR (400 MHz, CDCl3): δ 7.82 (d, *J* = 8.8 Hz, 2H), 7.36 (d, *J* = 8.8 Hz, 2H), 4.33 (s, 2H) ppm; 13C NMR (100 MHz, CDCl3): δ 190.2, 140.5, 132.3, 130.4, 129.2, 30.6 ppm.

**2-Bromo-1-(4-bromophenyl)ethan-1-one (2g).** White solid; yield: 91%; mp 108-109 °C (lit.[1] mp 106-107 °C);1H NMR (400 MHz, CDCl3): δ 7.79-7.74 (m, 2H), 7.58-7.52 (m, 2H), 4.32 (s, 2H) ppm; 13C NMR (100 MHz, CDCl3): δ 190.4, 132.7, 132.2, 130.4, 129.3, 30.4 ppm.

**2-Bromo-1-(4-fluorophenyl)ethan-1-one (2h).** White solid; yield: 93%; mp 49-50 °C (lit.[1] mp 50-51 °C);1H NMR (400 MHz, CDCl3): δ 8.05-7.99 (m, 2H), 7.19-7.13 (m, 2H), 4.43 (s, 2H) ppm; 13C NMR (100 MHz, CDCl3): δ 189.8, 166.1 (d, 1*J*C-F = 255.0 Hz), 131.7 (d, 3*J*C-F = 9.5 Hz), 130.4 (d, 14*J*C-F = 2.9 Hz), 116.1 (d, 2*J*C-F = 21.9 Hz), 30.6 ppm.

**2-Bromo-1-(3-fluorophenyl)ethan-1-one (2i).**White solid; yield: 93%; mp 62-63 °C; 1H NMR (400 MHz, CDCl3): δ 7.79-7.74 (m, 1H), 7.69-7.65 (m, 1H), 7.52-7.45 (m, 1H), 7.34-7.30 (m, 1H), 4.43 (s, 2H) ppm; 13C NMR (100 MHz, CDCl3): δ 190.2, 162.9 (d, 1*J*C-F = 247.2 Hz), 136.0 (d, 3*J*C-F = 6.4 Hz), 130.6 (d, 3*J*C-F = 7.6 Hz), 124.7 (d, 4*J*C-F = 3.0 Hz), 121.0 (d, 2*J*C-F = 21.4 Hz), 115.7 (d, 2*J*C-F = 22.5 Hz), 30.6 ppm; HRMS calcd for C8H6BrFO+ [M+]: 215.9586, found 215.9585.

**2-Bromo-1-(4-(trifluoromethyl)phenyl)ethan-1-one (2j).**White solid; yield: 95%; mp 54-55 °C (lit.[3] mp 55-56 °C);1H NMR (400 MHz, CDCl3): δ 8.10 (d, *J* = 8.0 Hz, 2H), 7.77 (d, *J* = 8.4 Hz, 2H), 4.47 (s, 2H) ppm; 13C NMR (100 MHz, CDCl3): δ 190.4, 136.6, 135.1 (q, 2*J*C-F = 32.6 Hz), 129.3, 125.9 (q, 3*J*C-F = 3.7 Hz), 123.4 (q, 1*J*C-F = 271.2 Hz), 30.3 ppm.

**Methyl 4-(2-bromoacetyl)benzoate (2k).**White solid; yield: 97%; mp 132-133 °C; 1H NMR (400 MHz, CDCl3): δ 8.11 (d, *J* = 8.0 Hz, 2H), 8.01 (d, *J* = 8.0 Hz, 2H), 4.45 (s, 2H), 3.93 (s, 3H) ppm; 13C NMR (100 MHz, CDCl3): δ 190.8, 165.9, 137.1, 134.6, 130.0, 128.8, 52.6, 30.8 ppm; HRMS calcd for C10H9BrO3+ [M+]: 255.9735, found 255.9739.

**4-(2-Bromoacetyl)benzonitrile (2l).** White solid; yield: 85%; mp 92-94 °C (lit.[4] mp 94-95 °C);1H NMR (400 MHz, CDCl3): δ 8.10 (d, *J* = 8.4 Hz, 2H), 7.82 (d, *J* = 8.4 Hz, 2H), 4.46 (s, 2H) ppm; 13C NMR (100 MHz, CDCl3): δ 190.1, 136.9, 132.7, 129.4, 117.7, 117.2, 30.2 ppm.

**2-Bromo-1-(3-nitrophenyl)ethan-1-one (2m).** Yellow solid; yield: 90%; mp 87-88 °C (lit.[5] mp 88-89 °C);1H NMR (400 MHz, CDCl3): δ 8.80 (s, 1H), 8.47 (d, *J* = 8.0 Hz, 1H), 8.34 (d, *J* = 7.6 Hz, 1H), 7.75 (t, *J* = 7.8 Hz, 1H), 4.51 (s, 2H) ppm; 13C NMR (100 MHz, CDCl3): δ 189.4, 148.5, 135.2, 134.5, 130.2, 128.1, 123.8, 30.1 ppm.

**2-Bromo-1-(4'-ethyl-[1,1'-biphenyl]-4-yl)ethan-1-one (2n).** White solid; yield: 93%; mp 63-64 °C;1H NMR (400 MHz, CDCl3): δ 8.03 (d, *J* = 8.4 Hz, 2H), 7.68 (d, *J* = 8.4 Hz, 2H), 7.55 (d, *J* = 8.4 Hz, 2H), 7.30 (d, *J* = 8.4 Hz, 2H), 4.45 (s, 2H), 2.70 (q, *J* = 7.6 Hz, 2H), 1.28 (t, *J* = 7.6 Hz, 3H) ppm; 13C NMR (100 MHz, CDCl3): δ 190.9, 146.6, 144.9, 136. 9, 132.4, 129.6, 128.6, 127.3, 127.2, 30.9, 28.6, 15.5 ppm; HRMS calcd for C16H15BrO+ [M+]: 302.0306, found 302.0312.

**2-Bromo-1-(naphthalen-1-yl)ethan-1-one (2o).** White solid; yield: 93%; mp 83-84 °C (lit.[4] mp 82-83 °C);1H NMR (400 MHz, CDCl3): δ 8.62 (d, *J* = 8.4 Hz, 1H), 7.98 (d, *J* = 8.4 Hz, 1H), 7.87-7.82 (m, 2H), 7.61-7.57 (m, 1H), 7.52 (t, *J* = 7.4 Hz, 1H), 7.44 (t, *J* = 7.6 Hz, 1H), 4.53 (s, 2H) ppm; 13C NMR (100 MHz, CDCl3): δ 194.2, 133.9, 133.8, 132.2, 130.5, 128.6, 128.5, 128.4, 126.7, 125.6, 124.2, 33.9 ppm.

**2-Bromo-1-(thiophen-3-yl)ethan-1-one (2p).**White solid; yield: 97%; mp 62-63 °C (lit.[1] mp 63-64 °C);1H NMR (400 MHz, CDCl3): δ 8.19-8.17 (m, 1H), 7.57 (dd, *J* = 5.2, 1.2 Hz, 1H), 7.36 (dd, *J* = 5.2, 1.2 Hz, 1H), 4.34 (s, 2H) ppm; 13C NMR (100 MHz, CDCl3): δ 185.5, 138.8, 133.7, 127.3, 126.9, 31.5 ppm.

**1-Bromooctan-2-one (2q).**[1]Colorless oil; yield: 95%;1H NMR (400 MHz, CDCl3): δ 3.89 (s, 2H), 2.65 (t, *J* = 7.4 Hz, 2H), 1.67-1.59 (m, 2H), 1.35-1.25 (m, 6H), 0.89 (t, *J* = 6.6 Hz, 3H) ppm; 13C NMR (100 MHz, CDCl3): δ 202.3, 39.9, 34.3, 31.5, 28.7, 23.8, 22.5, 14.0 ppm.

**1-Bromo-5-chloropentan-2-one (2r).**[1]Colorless oil; yield: 96%;1H NMR (400 MHz, CDCl3): δ 3.91 (s, 2H), 3.59 (t, *J* = 6.2 Hz, 2H), 2.88 (t, *J* = 7.0 Hz, 2H), 2.14-2.06 (m, 2H) ppm; 13C NMR (100 MHz, CDCl3): δ 201.1, 44.0, 36.6, 33.9, 26.4 ppm.

**2-Bromo-1-cyclohexylethan-1-one (2s).**[1]Colorless oil; yield: 85%;1H NMR (400 MHz, CDCl3): δ 3.97 (s, 2H), 2.75-2.67 (m, 1H), 1.94-1.75 (m, 4H), 1.70-1.65 (m, 1H), 1.42-1.24 (m, 5H) ppm; 13C NMR (100 MHz, CDCl3): δ 204.6, 48.0, 33.3, 28.7, 25.6, 25.5 ppm.

**2-Bromo-1-(cyclohex-1-en-1-yl)ethan-1-one (2t).**[1]Colorless oil; yield: 86%;1H NMR (400 MHz, CDCl3): δ 6.98 (t, *J* = 4.0 Hz, 1H), 4.16 (s, 2H), 2.31-2.24 (m, 4H), 1.68-1.58 (m, 4H) ppm; 13C NMR (100 MHz, CDCl3): δ 192.2, 142.7, 136.9, 29.9, 26.3, 23.3, 21.7, 21.3 ppm.

**2-Chloro-1-phenylethan-1-one (2u).** White solid; yield: 94%; mp 50-51 °C (lit.[1] mp 53-54 °C);1H NMR (400 MHz, CDCl3): δ 7.86 (d, *J* = 7.2 Hz, 2H), 7.53 (t, *J* = 7.4 Hz, 1H), 7.40 (t, *J* = 7.6 Hz, 2H), 4.63 (s, 2H) ppm; 13C NMR (100 MHz, CDCl3): δ 191.1, 134.3, 134.0, 128.9, 128.5, 46.1 ppm.

**2-Chloro-1-(4'-ethyl-[1,1'-biphenyl]-4-yl)ethan-1-one (2v).** White solid; yield: 95%; mp 62-63 °C; 1H NMR (400 MHz, CDCl3): δ 8.01 (d, *J* = 8.4 Hz, 2H), 7.69 (d, *J* = 8.4 Hz, 2H), 7.55 (d, *J* = 8.0 Hz, 2H), 7.31 (d, *J* = 8.0 Hz, 2H), 4.72 (s, 2H), 2.71 (q, *J* = 7.6 Hz, 2H), 1.28 (t, *J* = 7.6 Hz, 3H) ppm; 13C NMR (100 MHz, CDCl3): δ 190.7, 146.7, 144.9, 136.9, 132.7, 129.2, 128.6, 127.3, 127.2, 45.9, 28.6, 15.5 ppm; HRMS calcd for C16H15ClO+ [M+]: 258.0811, found 258.0806.

**2-Chloro-1-(4-chlorophenyl)ethan-1-one (2w).** White solid; yield: 93%; mp 101- 102 °C (lit.[6] mp 102-103 °C); 1H NMR (400 MHz, CDCl3): δ 7.82 (d, *J* = 8.8 Hz, 2H), 7.39 (d, *J* = 8.8 Hz, 2H), 4.59 (s, 2H) ppm; 13C NMR (100 MHz, CDCl3): δ 190.1, 140.6, 132.5, 130.0, 129.3, 45.7 ppm.

**2-Chloro-1-(thiophen-3-yl)ethan-1-one (2x).** White solid; yield: 96%; mp 73-74 °C (lit.[7] mp 75-76 °C);1H NMR (400 MHz, CDCl3): δ 8.16 (d, *J* = 1.6 Hz, 1H), 7.57 (d, *J* = 4.8 Hz, 1H), 7.37 (dd, *J* = 5.2, 2.8 Hz, 1H), 4.59 (s, 2H) ppm; 13C NMR (100 MHz, CDCl3): δ 185.4, 138.9, 133.3, 127.0, 126.9, 46.4 ppm.

**2-Iodo-1-phenylethan-1-one (2y).** White solid; yield: 90%; mp 48-49 °C (lit.[1] mp 49-51 °C);1H NMR (400 MHz, CDCl3): δ 7.99 (d, *J* = 7.2 Hz, 2H), 7.60 (t, *J* = 7.4 Hz, 1H), 7.49 (t, *J* = 7.6 Hz, 2H), 4.37 (s, 2H) ppm; 13C NMR (100 MHz, CDCl3): δ 193.0, 134.0, 133.7, 129.2, 129.0, 1.8 ppm.

**1-(4-Chlorophenyl)-2-iodoethan-1-one (2z).**White solid; yield: 90%; mp 73-74 °C (lit.[8] mp 74-75 °C);1H NMR (400 MHz, CDCl3): δ 7.92 (d, *J* = 8.4 Hz, 2H), 7.45 (d, *J* = 8.8 Hz, 2H), 4.33 (s, 2H) ppm; 13C NMR (100 MHz, CDCl3): δ 191.7, 140.3, 131.9, 130.5, 129.2, 1.3 ppm.

**1-(3-Fluorophenyl)-2-iodoethan-1-one (2a').** White solid; yield: 91%; mp 56-57 °C;1H NMR (400 MHz, CDCl3): δ 7.77 (d, *J* = 7.6 Hz, 1H), 7.70-7.64 (m, 1H), 7.50-7.44 (m, 1H), 7.33-7.26 (m, 1H), 4.34 (s, 2H) ppm; 13C NMR (100 MHz, CDCl3): δ 191.5, 162.8 (d, 1*J*C-F = 247.1 Hz), 135.5 (d, 3*J*C-F = 6.3 Hz), 130.4 (d, 3*J*C-F = 7.6 Hz), 124.7 (d, 4*J*C-F = 3.0 Hz), 120.8 (d, 2*J*C-F = 21.3 Hz), 115.7 (d, 2*J*C-F = 22.5 Hz), 1.1 ppm; HRMS calcd for C8H6FIO+ [M+]: 263.9447, found 263.9445.

**2-Iodo-1-(thiophen-3-yl)ethan-1-one (2b').**White solid; yield: 90%; mp 62-63 °C;1H NMR (400 MHz, CDCl3): δ 8.16 (dd, *J* = 2.8, 1.2 Hz, 1H), 7.56 (dd, *J* = 5.2, 1.2 Hz, 1H), 7.34 (dd, *J* = 5.2, 2.8 Hz, 1H), 4.26 (s, 2H) ppm; 13C NMR (100 MHz, CDCl3): δ 187.1, 138.4, 133.8, 127.5, 126.9, 2.8 ppm. HRMS calcd for C6H5IOS+ [M+]: 251.9106, found 251.9109.

**References**

[1] Xie, L.; Wu, Y.; Yi, W.; Zhu, L.; Xiang, J.; He, W. *J. Org. Chem.* **2013**, *78*, 9190-9195.

[2] Basavaiah, D.; Reddy, G. J.; Rao, K. V. *Tetrahedron: Asymmetry* **2004**, *15*, 1881-1888.

[3] Pravst, I.; Zupan, M.; Stavber, S. *Tetrahedron* **2008**, *64*, 5191-5199.

[4] Tada, N.; Ban, K.; Hirashima, S.; Miura, T.; Itoh, A. *Org. Biomol. Chem.* **2010**, *8*, 4701-4704.

[5] Duca, M.; Malnuit, V.; Barbault, F.; Benhida, R. *Chem. Commun.* **2010**, *46*, 6162-6164.

[6] Ram, R. N.; Manoj, T. P. *J. Org. Chem.* **2008**, *73*, 5633-5635.

[7] Guy, A.; Lemaire, M.; Guette, J. P. *Synthesis* **1982**, 1018-1020.

[8] Stavber, G.; Iskra, J.; Zupan, M.; Stavber, S. *Adv. Synth. Catal.* **2008**, *350*, 2921-2929.

Copies of 1H and 13C NMR spectra for compounds **2d**, **2e**, **2i**, **2k**, **2n**, **2v**, **2a'** and **2b'**.

1H NMR and 13C NMR spectra of compound **2d**

1H NMR and 13C NMR spectra of compound **2e**

1H NMR and 13C NMR spectra of compound **2i**

1H NMR and 13C NMR spectra of compound **2k**

1H NMR and 13C NMR spectra of compound **2n**

1H NMR and 13C NMR spectra of compound **2v**

1H NMR and 13C NMR spectra of compound **2a'**

1H NMR and 13C NMR spectra of compound **2b'**
